# Supplementary material for: Pathway Analysis of Fucoidan Activity Using a Yeast Gene Deletion Library Screen
Source: Mar Drugs. 2019 Jan 14;17(1):54. doi: 10.3390/md17010054 (PMC6356313; doi:10.3390/md17010054)
Supplement: Supplementary file 1 [file marinedrugs-17-00054-s001.xlsx]

## Sheet: Downregulated only
Table 1
ORF NAME	Gene Name	Cellular Process	Predicted Protein Function			Growth Inhibition (Fold Change)
YGL202W	ARO8	Amino acid biosynthesis	Aromatic aminotransferase I			2.94118
YGL148W	ARO2	Amino acid biosynthesis	Bifunctional chorismate synthase and flavin reductase			3.84615
YER055C	HIS1	Amino acid biosynthesis	ATP phosphoribosyltransferase			1.88679
YMR123W	PKR1	ATP synthesis	V-ATPase assembly factor			1.85185
YJR096W	YJR096W	Carbohydrate metabolism	Putative xylose and arabinose reductase			2.22222
YNL289W	PCL1	Cell cycle	Cyclin, interacts with cyclin-dependent kinase Pho85p			2.43902
YOL001W	PHO80	Cell cycle	Cyclin, interacts with cyclin-dependent kinase Pho85p			1.85185
YIL153W	RRD1	Cell cycle	Peptidyl-prolyl cis/trans-isomerase			2.94118
YMR006C	PLB2	Cell metabolism	Phospholipase B (lysophospholipase) involved in phospholipid metabolism			1.72414
YLR354C	TAL1	Cell metabolism	Transaldolase			2.08333
YLR304C	ACO1	Cell metabolism	Aconitase			2.12766
YPL023C	MET12	Cell metabolism	Protein with methylenetetrahydrofolate reductase (MTHFR) activity			1.85185
YML070W	DAK1	Cell metabolism	Dihydroxyacetone kinase			5.55556
YLR432W	IMD3	Cell metabolism	Inosine monophosphate dehydrogenase			2.63158
YDR017C	KCS1	Cell metabolism	Inositol hexakisphosphate (IP6) and inositol heptakisphosphate (IP7) kinase			1.88679
YDR019C	GCV1	Cell metabolism	T subunit of the mitochondrial glycine decarboxylase complex			4.16667
YDL168W	SFA1	Cell metabolism	Bifunctional enzyme containing both alcohol dehydrogenase and glutathione-dependent formaldehyde dehydrogenase activities			3.0303
YIL125W	KGD1	Cell metabolism	Component of the mitochondrial alpha-ketoglutarate dehydrogenase complex			2.38095
YNL130C	CPT1	Cell metabolism	Cholinephosphotransferase			2.38095
YGR032W	GSC2	Cell metabolism	Catalytic subunit of 1,3-beta-glucan synthase			2.43902
YJL137C	GLG2	Cell metabolism	Self-glucosylating initiator of glycogen synthesis			1.88679
YBR126C	TPS1	Cell metabolism	Synthase subunit of trehalose-6-phosphate synthase/phosphatase complex			3.84615
YBR149W	ARA1	Cell metabolism	NADP+ dependent arabinose dehydrogenase			2.12766
YMR247C	RKR1	Chromatin Structure	RING domain E3 ubiquitin ligase; involved in the ubiquitin-mediated degradation of non-stop proteins; functional connections to chromatin modification; nuclear protein that also co-localizes with ribosomes; homolog of mouse Listerin, whose mutation has been reported to cause neurodegeneration in mice			1.75439
YDR532C	KRE28	Chromatin Structure	Subunit of a kinetochore-microtubule binding complex			2.27273
YJL020C	YJL021C	Cytoskeleton	Protein possibly involved in assembly of actin patches			3.57143
YER155C	BEM2	Cytoskeleton	Rho GTPase activating protein (RhoGAP)			2.17391
YDR121W	DPB4	DNA replication	Shared subunit of DNA polymerase (II) epsilon and of ISW2/yCHRAC chromatin accessibility complex; involved in both chromosomal DNA replication and in inheritance of telomeric silencing			1.63934
YDR372C	VPS74	Golgi organisation	Protein required for Golgi localization of glycosyltransferases; binds the cytosolic domains of Golgi glycosyltransferases; binding to PtdIns4P required for Golgi targeting and function; tetramer formation required for function			2.32558
YEL017C-A	PMP2	Ion transport	Proteolipid associated with plasma membrane H(+)-ATPase (Pma1p); regulates plasma membrane H(+)-ATPase activity; nearly identical to PMP1			1.75439
YDR506C	GMC1	Iron homeostasis	Possible membrane-localized protein			4.54545
YDR534C	FIT1	Iron homeostasis	Mannoprotein			7.14286
YDR018C	YDR018C	Lipid metabolism	Probable membrane protein with three predicted transmembrane domains			2.38095
YDR004W	RAD57	Meiosis	Protein that stimulates strand exchange by stabilizing the binding of Rad51p to single-stranded DNA			3.0303
YBR098W	YBR100W	Meiosis	Subunit of the structure-specific Mms4p-Mus81p endonuclease that cleaves branched DNA			5
YDR512C	EMI1	Meiosis	Non-essential protein required for transcriptional induction of the early meiotic-specific transcription factor IME1			5
YGR132C	PHB1	Mitochondrial maintenance	Subunit of the prohibitin complex (Phb1p-Phb2p), a 1.2 MDa ring-shaped inner mitochondrial membrane chaperone that stabilizes newly synthesized proteins; determinant of replicative life span; involved in mitochondrial segregation			1.69492
YGR144W	THI4	Mitochondrial maintenance	Thiazole synthase, catalyzes formation of a thiazole intermediate during thiamine biosynthesis; required for mitochondrial genome stability in response to DNA damaging agents			2.77778
YLR251W	SYM1	Mitochondrial maintenance	Protein required for ethanol metabolism; induced by heat shock and localized to the inner mitochondrial membrane; homologous to mammalian peroxisomal membrane protein Mpv17			4
YPL040C	ISM1	Mitochondrial maintenance	Mitochondrial isoleucyl-tRNA synthetase			2.22222
YPR045C	THP3	mRNA processing	Protein that forms a complex with Csn12p that is recruited to transcribed genes and may have a role in transcription elongation			3.125
YPR101W	SNT309	mRNA processing	Member of the NineTeen Complex (NTC) that contains Prp19p and stabilizes U6 snRNA in catalytic forms of the spliceosome containing U2, U5, and U6 snRNAs			2.08333
YDL116W	NUP84	mRNA processing	Subunit of the nuclear pore complex (NPC); forms a subcomplex with Nup85p, Nup120p, Nup145p-C, Sec13p, and Seh1p that plays a role in nuclear mRNA export, and NPC biogenesis			2.85714
YDL044C	MTF2	mRNA processing	Mitochondrial matrix protein that interacts with an N-terminal region of mitochondrial RNA polymerase (Rpo41p) and couples RNA processing and translation to transcription			1.85185
YJR069C	SWI3	Nucleotide metabolism	Conserved protein with deoxyribonucleoside triphosphate pyrophosphohydrolase activity			6.25
YLR083C	EMP70	Organelle transport	Protein with a role in cellular adhesion, filamentous growth, and endosome-to-vacuole sorting; similar to Tmn2p and Tmn3p; member of Transmembrane Nine family of proteins with 9 transmembrane segments			1.75439
YLR364W	GRX8	oxidative stress	Glutaredoxin that employs a dithiol mechanism of catalysis			1.88679
YDL243C	AAD4	oxidative stress	Putative aryl-alcohol dehydrogenase, involved in oxidative stress response			10
YOL147C	PEX11	Peroxisome organisation	Peroxisomal membrane protein required for medium-chain fatty acid oxidation and peroxisome proliferation			2.38095
YGL203C	KEX1	Protein degradation	Protease involved in the processing of killer toxin and alpha factor precursor			1.88679
YGR133W	PEX4	Protein processing	Peroxisomal ubiquitin conjugating enzyme required for peroxisomal matrix protein import and peroxisome biogenesis			2.38095
YDL230W	PTP1	Protein processing	Phosphotyrosine-specific protein phosphatase that dephosphorylates a broad range of substrates in vivo			2.04082
YBR290W	BSD2	Protein processing	Heavy metal ion homeostasis protein, facilitates trafficking of Smf1p and Smf2p metal transporters to the vacuole where they are degraded			4.54545
YIL112W	HOS4	Protein processing	Subunit of the Set3 complex, which is a meiotic-specific repressor of sporulation specific genes that contains deacetylase activity			3.33333
YOR265W	RBL2	Protein processing	Protein involved in microtubule morphogenesis, required for protection from excess free beta-tubulin			1.96078
YOR275C	RIM20	Protein processing	Protein involved in proteolytic activation of Rim101p in response to alkaline pH			2.94118
YAL016W	TPD3	Protein processing	Regulatory subunit A of the heterotrimeric protein phosphatase 2A (PP2A)			2.94118
YFL016C	MDJ1	Protein processing	Co-chaperone that stimulates the ATPase activity of the HSP70 protein Ssc1p, involved in protein folding/refolding in the mitochodrial matrix			1.85185
YLL028W	TPO1	Protein transport	Polyamine transporter that recognizes spermine, putrescine, and spermidine; catalyzes uptake of polyamines at alkaline pH and excretion at acidic pH; phosphorylation enhances activity and sorting to the plasma membrane			3.57143
YFL010W-A	AUA1	Protein transport	Protein required for the negative regulation by ammonia of Gap1p, which is a general amino acid permease			2.32558
YGL206C	CHC1	Protein transport	Clathrin heavy chain, subunit of the major coat protein involved in intracellular protein transport and endocytosis			1.85185
YGR276C	RNH70	Ribosomal RNA processing	3'-5' exoribonuclease; required for maturation of 3' ends of 5S rRNA and tRNA-Arg3 from dicistronic transcripts			2.77778
YAL035W	FUN12	Ribosome biogenesis	GTPase, required for general translation initiation by promoting Met-tRNAiMet binding to ribosomes and ribosomal subunit joining; homolog of bacterial IF2			2.17391
YGR285C	ZUO1	Ribosome biogenesis	Ribosome-associated chaperone, functions in ribosome biogenesis and, in partnership with Ssz1p and SSb1/2, as a chaperone for nascent polypeptide chains			2.27273
YBR271W	EFM2	Ribosome biogenesis	Putative S-adenosylmethionine-dependent methyltransferase of the seven beta-strand family			1.78571
YOR251C	TUM1	RNA modification	Rhodanese domain sulfur transferase, accepts persulfite from Nfs1p and transfers it to Uba4p in the pathway for 2-thiolation of the wobble uridine base of tRNAs; also stimulates sulfur transfer by Nfs1p; may be mitochondrially localized			1.69492
YPR062W	FCY1	Nucleotide metabolism	Cytosine deaminase, zinc metalloenzyme that catalyzes the hydrolytic deamination of cytosine to uracil			2.27273
YDR144C	MKC7	Signalling	GPI-anchored aspartyl protease, member of the yapsin family of proteases involved in cell wall growth and maintenance; shares functions with Yap3p and Kex2p			4.54545
YPL026C	SKS1	Signalling	Putative serine/threonine protein kinase			2.5
YCL058C	FYV5	Signalling	Protein involved in regulation of the mating pathway; binds with Matalpha2p to promoters of haploid-specific genes; required for survival upon exposure to K1 killer toxin; involved in ion homeostasis			3.57143
YNL025C	SSN8	Signalling	Cyclin-like component of the RNA polymerase II holoenzyme, involved in phosphorylation of the RNA polymerase II C-terminal domain			2.77778
YMR139W	RIM11	Signalling	Protein kinase required for signal transduction during entry into meiosis			1.81818
YER129W	SAK1	Signalling	Upstream serine/threonine kinase for the SNF1 complex			1.81818
YNL111C	CYB5	Sterol metabolism	Cytochrome b5, involved in the sterol and lipid biosynthesis pathways			4.34783
YCR081W	SRB8	Transcription	Subunit of the RNA polymerase II mediator complex; associates with core polymerase subunits to form the RNA polymerase II holoenzyme; essential for transcriptional regulation; involved in glucose repression			2
YNL097C	PHO23	Transcription	Probable component of the Rpd3 histone deacetylase complex, involved in transcriptional regulation of PHO5			3.33333
YBR081C	SPT7	Transcription	Subunit of the SAGA transcriptional regulatory complex			3.84615
YBR103W	SIF2	Transcription	WD40 repeat-containing subunit of the Set3C histone deacetylase complex			3.7037
YGL127C	SOH1	Transcription	Subunit of the RNA polymerase II mediator complex; associates with core polymerase subunits to form the RNA polymerase II holoenzyme			8.33333
YLR373C	VID22	Transport	Glycosylated integral membrane protein localized to the plasma membrane; plays a role in fructose-1,6-bisphosphatase (FBPase) degradation			7.69231
YDR150W	NUM1	Transport	Protein required for nuclear migration, localizes to the mother cell cortex and the bud tip; may mediate interactions of dynein and cytoplasmic microtubules with the cell cortex			2.38095
YFL004W	VTC2	Vacuole function	Subunit of the vacuolar transporter chaperone (VTC) complex involved in membrane trafficking			3.22581
YGR079W	YGR079W	Unknown function				1.85185
YMR073C	IRC21	Unknown function				2.12766
YLR091W	GEP5	Unknown function				2.04082
YDR114C	YDR114C	Unknown function				1.72414
YDR352W	YPQ2	Unknown function				1.75439
YER004W	FMP52	Unknown function				1.75439
YER085C	YER085C	Unknown function				1.72414
YGR146C	ECL1	Unknown function				2.43902
YHR029C	YHI9	Unknown function				2.43902
YLR374C	YLR374C	Unknown function				4.34783
YLR408C	BLS1	Unknown function				1.92308
YLR232W	YLR232W	Unknown function				8.33333
YGL230C	YGL230C	Unknown function				3.0303
YPL056C	LCL1	Unknown function				2.12766
YPR061C	JID1	Unknown function				3.22581
YNR066C	YNR066C	Unknown function				3.44828
YDR015C	YDR015C	Unknown function				5.88235
YJR011C	YJR011C	Unknown function				8.33333
YNL010W	YNL010W	Unknown function				3.33333
YIL152W	YIL152W	Unknown function				5
YIL165C	YIL165C	Unknown function				3.7037
YNL120C	YNL120C	Unknown function				2.27273
YJL160C	PIR5	Unknown function				2.5641
YKR046C	PET10	Unknown function				5.55556
YPR078C	YPR078C	Unknown function				5.55556
YBR116C	YBR116C	Unknown function				2.12766
YGL101W	YGL101W	Unknown function				1.81818
YGL109W	YGL109W	Unknown function				1.92308
YGL114W	YGL114W	Unknown function				3.22581
YGL118C	YGL118C	Unknown function				4.54545
YGL132W	YGL132W	Unknown function				4.54545
YER152C	YER152C	Unknown function				1.81818
YDR242W	AMD2	Unknown function				3.33333

## Sheet: Upregulated only
ORF NAME	Gene Name	Cellular Process	Predicted Protein Function		Genes Upregulated Fold Change (FC)
YGR155W	CYS4	Amino acid biosynthesis	Cystathionine beta-synthase, catalyzes synthesis of cystathionine from serine and homocysteine, the first committed step in cysteine biosynthesis		1.5
YBR166C	TYR1	Amino acid biosynthesis	Prephenate dehydrogenase involved in tyrosine biosynthesis		1.52
YOL136C	PFK27	Carbohydrate metabolism	6-phosphofructo-2-kinase, catalyzes synthesis of fructose-2,6-bisphosphate		1.65
YJL098W	SAP185	Cell cycle	Protein that forms a complex with the Sit4p protein phosphatase and is required for its function		1.53
YMR055C	BUB2	Cell cycle	Mitotic exit network regulator, forms GTPase-activating Bfa1p-Bub2p complex that binds Tem1p and spindle pole bodies		1.54
YDL047W	SIT4	Cell cycle	Type 2A-related serine-threonine phosphatase that functions in the G1/S transition of the mitotic cycle		1.86
YER016W	BIM1	Cell cycle	Microtubule-binding protein that together with Kar9p makes up the cortical microtubule capture site and delays the exit from mitosis		2.22
YDL012C	YDL012C	Cell growth	Tail-anchored plasma membrane protein containing a conserved CYSTM module, possibly involved in response to stress		1.69
YNL333W	SNZ2	Cell metabolism	Member of a stationary phase-induced gene family		1.53
YDR402C	DIT2	Cell metabolism	N-formyltyrosine oxidase, sporulation-specific microsomal enzyme involved in the production of N,N-bisformyl dityrosine required for spore wall maturation		1.56
YHR073W	OSH3	Cell metabolism	Member of an oxysterol-binding protein family with seven members in S. cerevisiae; family members have overlapping, redundant functions in sterol metabolism and collectively perform a function essential for viability		1.5
YHR179W	OYE2	Cell metabolism	Conserved NADPH oxidoreductase containing flavin mononucleotide (FMN), homologous to Oye3p with different ligand binding and catalytic properties		1.7
YHR183W	GND1	Cell metabolism	6-phosphogluconate dehydrogenase (decarboxylating), catalyzes an NADPH regenerating reaction in the pentose phosphate pathway		4.84
YJR019C	TES1	Cell metabolism	Peroxisomal acyl-CoA thioesterase likely to be involved in fatty acid oxidation rather than fatty acid synthesis		1.53
YJR049C	UTR1	Cell metabolism	ATP-NADH kinase; phosphorylates both NAD and NADH		2.19
YDL181W	INH1	Cell metabolism	ATP-NADH kinase; phosphorylates both NAD and NADH		8.4
YDL182W	LYS20	Cell metabolism	Homocitrate synthase isozyme, catalyzes the condensation of acetyl-CoA and alpha-ketoglutarate to form homocitrate		3.01
YDL078C	MDH3	Cell metabolism	Peroxisomal malate dehydrogenase, catalyzes interconversion of malate and oxaloacetate		1.66
YER178W	PDA1	Cell metabolism	E1 alpha subunit of the pyruvate dehydrogenase (PDH) complex, catalyzes the direct oxidative decarboxylation of pyruvate to acetyl-CoA		2.26
YML110C	COQ5	Cell metabolism	2-hexaprenyl-6-methoxy-1,4-benzoquinone methyltransferase, involved in ubiquinone (Coenzyme Q) biosynthesis		1.69
YEL036C	ANP1	Cell metabolism	Subunit of the alpha-1,6 mannosyltransferase complex		2.25
YHR158C	KEL1	Cell morphology	Protein required for proper cell fusion and cell morphology		1.65
YIR019C	FLO11	Cell morphology	GPI-anchored cell surface glycoprotein (flocculin) required for pseudohyphal formation, invasive growth, flocculation, and biofilms;		1.51
YJL176C	SWI3	Chromatin structure	Subunit of the SWI/SNF chromatin remodeling complex, which regulates transcription by remodeling chromosomes		3.36
YJL065C	DLS1	Chromatin structure	Subunit of ISW2/yCHRAC chromatin accessibility complex along with Itc1p, Isw2p, and Dpb4p; involved in inheritance of telomeric silencing		4.33
YFR013W	IOC3	Chromatin structure	Member of a complex (Isw1a) with Isw1p that has nucleosome-stimulated ATPase activity and represses transcription initiation by specific positioning of a promoter proximal dinucleosome		1.52
YBR289W	SNF5	Chromatin structure	Subunit of the SWI/SNF chromatin remodeling complex involved in transcriptional regulation		1.73
YHR114W	BZZ1	Cytoskeleton	SH3 domain protein implicated in the regulation of actin polymerization, able to recruit actin polymerization machinery through its SH3 domains		1.58
YMR284W	YKU70	DNA repair	Subunit of the telomeric Ku complex (Yku70p-Yku80p), involved in telomere length maintenance		1.68
YEL037C	RAD23	DNA repair	Protein with ubiquitin-like N terminus, subunit of Nuclear Excision Repair Factor 2 (NEF2) with Rad4p that binds damaged DNA		2
YNL085W	MKT1	DNA repair	Protein that forms a complex with Pbp1p that may mediate posttranscriptional regulation of HO		1.59
YBR114W	RAD16	DNA repair	Protein that recognizes and binds damaged DNA in an ATP-dependent manner (with Rad7p) during nucleotide excision repair		1.74
YLR154C	RNH203	DNA replication	Ribonuclease H2 subunit, required for RNase H2 activity; related to human AGS3 that causes Aicardi-Goutieres syndrome		1.6
YPL145C	KES1	Golgi organisation	Member of the oxysterol binding protein family, which includes seven yeast homologs; involved in negative regulation of Sec14p-dependent Golgi complex secretory functions		1.54
YGR057C	LST7	Golgi organisation	Protein possibly involved in a post-Golgi secretory pathway		1.76
YOL152W	FRE7	Ion transport	Putative ferric reductase with similarity to Fre2p		1.68
YLR369W	SSQ1	Iron homeostasis	Mitochondrial hsp70-type molecular chaperone, required for assembly of iron/sulfur clusters into proteins at a step after cluster synthesis, and for maturation of Yfh1p, which is a homolog of human frataxin implicated in Friedreich's ataxia		1.7
YJL196C	ELO1	Lipid metabolism	Elongase I, medium-chain acyl elongase, catalyzes carboxy-terminal elongation of unsaturated C12-C16 fatty acyl-CoAs to C16-C18 fatty acids		1.58
YJL134W	LCB3	Lipid metabolism	Long-chain base-1-phosphate phosphatase with specificity for dihydrosphingosine-1-phosphate		3.59
YJL083W	TAX4	Lipid metabolism	EH domain-containing protein involved in regulating phosphatidylinositol 4,5-bisphosphate levels and autophagy		2.62
YER122C	GLO3	Lipid metabolism	Phosphopantetheine:protein transferase (PPTase), activates mitochondrial acyl carrier protein (Acp1p) by phosphopantetheinylation		2.02
YNL012W	SPO1	Meiosis	Meiosis-specific prospore protein; required for meiotic spindle pole body duplication and separation		4.65
YDL001W	RMD1	Meiosis	Cytoplasmic protein required for sporulation		1.87
YFL003C	MSH4	Meiosis	Protein involved in meiotic recombination, required for normal levels of crossing over		1.62
YMR257C	PET111	Mitochondrial maintenance	Mitochondrial translational activator specific for the COX2 mRNA; located in the mitochondrial inner membrane		2.42
YDR115W	YDR115W	Mitochondrial maintenance	Putative mitochondrial ribosomal protein of the large subunit		1.59
YDR375C	BCS1	Mitochondrial maintenance	Mitochondrial protein of the AAA ATPase family		1.64
YJL209W	CBP1	Mitochondrial maintenance	Mitochondrial protein that interacts with the 5'-untranslated region of the COB mRNA and has a role in its stability and translation		1.97
YJL208C	NUC1	Mitochondrial maintenance	Major mitochondrial nuclease, has RNAse and DNA endo- and exonucleolytic activities; has roles in mitochondrial recombination, apoptosis and maintenance of polyploidy		1.52
YLR356W	ATG33	Mitochondrial maintenance	Mitochondrial mitophagy-specific protein; required primarily for mitophagy induced at the post-log phase		2.66
YDR150W	NUM1	Mitochondrial maintenance	Protein required for nuclear migration, localizes to the mother cell cortex and the bud tip		1.51
YPL060W	MFM1	Mitochondrial maintenance	Mitochondrial inner membrane magnesium transporter, involved in maintenance of mitochondrial magnesium concentrations and membrane potential		1.53
YDR470C	UGO1	Mitochondrial maintenance	Outer membrane component of the mitochondrial fusion machinery		2.67
YIL098C	FMC1	Mitochondrial maintenance	Mitochondrial matrix protein, required for assembly or stability at high temperature of the F1 sector of mitochondrial F1F0 ATP synthase		3.81
YOR147W	MDM32	Mitochondrial maintenance	Mitochondrial inner membrane protein with similarity to Mdm31p, required for normal mitochondrial morphology and inheritance		1.71
YNL271C	BNI1	Mitosis	Formin, nucleates the formation of linear actin filaments, involved in cell processes such as budding and mitotic spindle orientation		1.75
YEL061C	CIN8	Mitosis	Kinesin motor protein involved in mitotic spindle assembly and chromosome segregation		5.03
YPR111W	DBF20	Mitosis	Ser/Thr kinase involved in late nuclear division, one of the mitotic exit network (MEN) proteins		1.53
YKR048C	NAP1	Mitosis	Protein that interacts with mitotic cyclin Clb2p; required for the regulation of microtubule dynamics during mitosis		2.29
YDR206W	EBS1	mRNA processing	Protein involved in inhibition of translation and nonsense-mediated decay; interacts with cap binding protein Cdc33p and with Nam7p		1.6
YHR132W-A	IGO2	mRNA processing	Protein required for initiation of G0 program; prevents degradation of nutrient-regulated mRNAs via the 5'-3' mRNA decay pathway		1.57
YML022W	APT1	Nucleotide metabolism	Adenine phosphoribosyltransferase, catalyzes the formation of AMP from adenine and 5-phosphoribosylpyrophosphate		1.67
YER070W	RNR1	Nucleotide metabolism	Major isoform of the large subunit of ribonucleotide-diphosphate reductase		1.5
YPL112C	PEX25	Peroxisome organisation	Peripheral peroxisomal membrane peroxin required for the regulation of peroxisome size and maintenance		1.51
YHR150W	PEX28	Peroxisome organisation	Peroxisomal integral membrane peroxin, involved in the regulation of peroxisomal size, number and distribution		1.52
YGR004W	PEX31	Peroxisome organisation	Peroxisomal integral membrane protein, involved in negative regulation of peroxisome size		1.58
YDR349C	YPS7	Protein degradation	Putative GPI-anchored aspartic protease, member of the yapsin family of proteases involved in cell wall growth and maintenance		9.37
YLR207W	HRD3	Protein degradation	Resident protein of the ER membrane that plays a central role in ER-associated protein degradation (ERAD)		1.61
YLR090W	XDJ1	Protein Processing	Putative chaperone, homolog of E. coli DnaJ, closely related to Ydj1p;		2.88
YMR191W	SPG5	Protein processing	Protein required for survival at high temperature during stationary phase; not required for growth on nonfermentable carbon sources		1.6
YOR027W	STI1	Protein Processing	Hsp90 cochaperone, interacts with the Ssa group of the cytosolic Hsp70 chaperones and activates Ssa1p ATPase activity		1.54
YEL030W	ECM10	Protein Processing	Heat shock protein of the Hsp70 family, localized in mitochondrial nucleoids, plays a role in protein translocation		1.8
YGR203W	YCH1	Protein Processing	Phosphatase with sequence similarity to Cdc25p, Arr2p and Mih1p; member of the single-domain rhodanese homology superfamily		1.66
YLR224W	YLR224W	Protein Processing	F-box protein and component of SCF ubiquitin ligase complexes involved in ubiquitin-dependent protein catabolism		1.59
YNL077W	APJ1	Protein Processing	Putative chaperone of the HSP40 (DNAJ) family		1.58
YNL064C	YDJ1	Protein Processing	Type I HSP40 co-chaperone involved in regulation of the HSP90 and HSP70 functions		1.77
YBR125C	PTC4	Protein processing	Cytoplasmic type 2C protein phosphatase (PP2C)		2.39
YCR069W	CPR4	Protein processing	Peptidyl-prolyl cis-trans isomerase (cyclophilin), catalyzes the cis-trans isomerization of peptide bonds N-terminal to proline residues		2.09
YMR191W	SPG5	Protein processing	Protein required for survival at high temperature during stationary phase		1.64
YMR322C	SNO4	Protein processing	Possible chaperone and cysteine protease, similar to bacterial Hsp31 and yeast Hsp31p, Hsp32p, and Hsp33p; DJ-1/ThiJ/PfpI superfamily member		1.94
YDL090C	RAM1	Protein Processing	Beta subunit of the CAAX farnesyltransferase (FTase) that prenylates the a-factor mating pheromone and Ras proteins		1.61
YDR504C	SPG3	Protein Processing	Protein required for survival at high temperature during stationary phase		1.64
YFL007W	BLM10	Protein processing	Proteasome activator subunit; found in association with core particles, with and without the 19S regulatory particle		2.46
YGL095C	VPS45	Protein Processing	Protein of the Sec1p/Munc-18 family, essential for vacuolar protein sorting		1.68
YJR032W	CPR7	Protein processing	Peptidyl-prolyl cis-trans isomerase (cyclophilin), catalyzes the cis-trans isomerization of peptide bonds N-terminal to proline residues		2.14
YEL044W	IES6	Protein Processing	Subunit of the N-terminal acetyltransferase NatA (Nat1p, Ard1p, Nat5p); N-terminally acetylates many proteins		1.75
YDR358W	GGA1	Protein transport	Golgi-localized protein with homology to gamma-adaptin		3.44
YMR014W	BUD22	Ribosome biogenesis	Protein required for 18S rRNA maturation and small ribosomal subunit biogenesis		1.55821
YMR242C	RPL20a	Ribosome biogenesis	Protein component of the large (60S) ribosomal subunit, nearly identical to Rpl20Bp and has similarity to rat L18a ribosomal protein		6.27
YDR101C	ARX1	Ribosome biogenesis	Shuttling pre-60S factor; involved in the biogenesis of ribosomal large subunit biogenesis		1.59
YGR159C	NSR1	Ribosome biogenesis	Nucleolar protein that binds nuclear localization sequences, required for pre-rRNA processing and ribosome biogenesis		2.23
YKR024C	DBP7	Ribosome biogenesis	Putative ATP-dependent RNA helicase of the DEAD-box family involved in ribosomal biogenesis		2.29
YJL122W	ALB1	Ribosome biogenesis	Shuttling pre-60S factor; involved in the biogenesis of ribosomal large subunit		1.65
YDL202W	MRPL11	Ribosome biogenesis	mitochondrial ribosomal protein of the large subunit		1.6
YCR047C	BUD23	RNA processing	Methyltransferase, methylates residue G1575 of 18S rRNA		5.47
YGR271C-A	EFG1	RNA processing	Essential protein required for maturation of 18S rRNA		1.78
YML006C	GIS4	Signalling	CAAX box containing protein of unknown function, proposed to be involved in the RAS/cAMP signaling pathway		2.69
YDR085C	AFR1	Signalling	Protein required for pheromone-induced projection (shmoo) formation; regulates septin architecture during mating		1.56
YHL023C	NPR3	Signalling	Subunit of the conserved Npr2/3 complex that mediates downregulation of TORC1 activity upon amino acid limitation		2.63
YJL164C	TPK1	Signalling	cAMP-dependent protein kinase catalytic subunit; promotes vegetative growth in response to nutrients via the Ras-cAMP signaling pathway		3.28
YER027C	GAL83	Signalling	One of three possible beta-subunits of the Snf1 kinase complex		1.71
YNL090W	RHO2	Signalling	Non-essential small GTPase of the Rho/Rac subfamily of Ras-like proteins, involved in the establishment of cell polarity and in microtubule assembly		1.5
YML081W	TDA9	Transcription	DNA-binding protein, putative transcription factor		2.23
YPL042C	SSN3	Transcription	Cyclin-dependent protein kinase, component of RNA polymerase II holoenzyme; involved in phosphorylation of the RNA polymerase II C-terminal domain; involved in glucose repression		2.79
YPR065W	ROX1	Transcription	Heme-dependent repressor of hypoxic genes		1.6
YBR033W	EDS1	Transcription	Putative zinc cluster protein		1.75
YKL139W	CTK1	Transcription	Catalytic (alpha) subunit of C-terminal domain kinase I (CTDK-I)		1.67
YBR083W	TEC1	Transcription	Transcription factor required for full Ty1 expression		2.04
YCR084C	TUP1	Transcription	General repressor of transcription, forms complex with Cyc8p, involved in the establishment of repressive chromatin structure through interactions with histones H3 and H4		3.57
YLR403W	SFP1	Transcription	Transcription factor that controls expression of ribosome biogenesis genes in response to nutrients and stress, regulates G2/M transitions during mitotic cell cycle and DNA-damage response		1.71
YDL072C	YET3	Transcription	Component of the EKC/KEOPS protein complex with Kae1p, Cgi121p, Pcc1p, and Bud32p; EKC/KEOPS complex is required for t6A tRNA modification and may have roles in telomere maintenance and transcription		2.2
YJL140W	RPB4	Transcription	RNA polymerase II subunit B32; forms two subunit dissociable complex with Rpb7p		2.26
YEL054C	RPL12a	Translation	Protein component of the large (60S) ribosomal subunit		2.53
YGR148C	RPL24b	Translation	Ribosomal protein L30 of the large (60S) ribosomal subunit		3.58
YBR189W	RPS9b	Translation	Protein component of the small (40S) ribosomal subunit		4.07
YPR043W	RPL43a	Translation	Protein component of the large (60S) ribosomal subunit		1.62
YGR173W	RBG2	Translation	Protein with a role in translation; forms a complex with Gir2p; has similarity to mammalian developmentally regulated GTP-binding protein		1.5
YLR382C	NAM2	Translation	Mitochondrial leucyl-tRNA synthetase, also has a direct role in splicing of several mitochondrial group I introns		2.45
YHR010W	RPL27a	Translation	Protein component of the large (60S) ribosomal subunit		3.11
YHR021C	RPS27b	Translation	Protein component of the small (40S) ribosomal subunit		4.14
YDR500C	RPL37b	Translation	Protein component of the large (60S) ribosomal subunit		1.54
YDR406W	PDR15	Transport	Plasma membrane ATP binding cassette (ABC) transporter, multidrug transporter and general stress response factor implicated in cellular detoxification		1.94
YEL063C	CAN1	Transport	Plasma membrane arginine permease, requires phosphatidyl ethanolamine (PE) for localization		2.33
YHR108W	GGA2	Transport	Protein that interacts with and regulates Arf1p and Arf2p in a GTP-dependent manner to facilitate traffic through the late Golgi		1.5
YJL154C	VPS35	Transport	Endosomal subunit of membrane-associated retromer complex required for retrograde transport		2.46
YLR360W	VPS38	Transport	Part of a Vps34p phosphatidylinositol 3-kinase complex that functions in carboxypeptidase Y (CPY) sorting		1.56
YPL058C	PDR12	Transport	Plasma membrane ATP-binding cassette (ABC) transporter, weak-acid-inducible multidrug transporter required for weak organic acid resistance		1.57
YOL103W	ITR2	Transport	Myo-inositol transporter with strong similarity to the major myo-inositol transporter Itr1p, member of the sugar transporter superfamily		4.34
YDL199C	YDL199C	Transport	Putative transporter, member of the sugar porter family		1.52
YIL114C	POR2	Transport	Putative mitochondrial porin (voltage-dependent anion channel)		1.92
YKR027W	BCH2	Transport	Member of the ChAPs family of proteins (Chs5p-Arf1p-binding proteins: Bch1p, Bch2p, Bud7p, Chs6p)		2.06
YLR237W	THI7	Transport	Plasma membrane transporter responsible for the uptake of thiamine, member of the major facilitator superfamily of transporters		1.58
YBR104W	YMC2	Transport	Mitochondrial protein, putative inner membrane transporter with a role in oleate metabolism and glutamate biosynthesis		1.68
YBR127C	VMA2	Transport	Subunit B of the eight-subunit V1 peripheral membrane domain of the vacuolar H+-ATPase (V-ATPase), an electrogenic proton pump found throughout the endomembrane system		1.71
YLR104W	LCL2	unknown function			3.88
YMR253C	YMR253C	Unknown function			1.58
YNL338W	YNL338W	Unknown function			1.56
YPL205C	YPL205C	Unknown function			1.83
YDR340W	YDR340W	unknown function			1.72
YEL033W	MTC7	unknown function			2.11
YEL059W	YEL059W	Unknown function			3.61
YGR153W	YGR153W	unknown function			1.67
YHL037C	YHL037C	unknown function			2
YHL008C	YHL008C	unknown function			7.39
YHR156C	LIN1	Unknown function			1.64
YHR182W	YHR182W	unknown function			1.51
YHR199C	AIM46	Unknown function			2.14
YCL046W	YCL046W	Unknown function			1.77
YKL037W	AIM26	Unknown function			1.68
YJL169W	YJL169W	Unknown function			1.71
YJL150W	YJL150W	unknown function			1.5
YGR228W	YGR228W	unknown function			1.84
YJR128W	YJR128W	Unknown function			2.37
YGL235W	YGL235W	Unknown function			1.63
YJR080C	AIM24	unknown function			4.33
YDL241W	YDL241W	Unknown function			1.7
YDL169C	UGX2	Unknown function			3.92
YOR309C	YOR309C	Unknown function			4.65
YOR325W	YOR325W	Unknown function			2.17
YNL013C	YNL013C	Unknown function			2.17
YNR040W	YNR040W	Unknown function			1.6
YBR051W	YBR051W	Unknown function			1.64
YNL108C	YNL108C	Unknown function			2.09
YNL074C	MLF3	Unknown function			1.54
YNL095C	YNL095C	Unknown function			1.53
YNL100W	MIC27	Unknown function			1.55
YBR090C	YBR090C	Unknown function			2.29
YLR334C	YLR334C	Unknown function			1.55
YMR135W-A	YMR135W-A	Unknown function			1.94
YIR030C	DCG1	Unknown function			1.73
YDL062W	YDL062W	Unknown function			2.9
YJR055W	HIT1	Unknown function			1.96
YIL102C	YIL102C	Unknown function			1.57
YGR272C	YGR272C	Unknown function			1.99
YLR361C-A	YLR361C-A	Unknown function			1.62
YEL027W	VMA3	Vacuole function	Proteolipid subunit of the vacuolar H(+)-ATPase V0 sector (subunit c; dicyclohexylcarbodiimide binding subunit)		1.64
YCL063W	VAC17	Vacuole function	Phosphoprotein involved in vacuole inheritance		1.76
